# Supplementary material
Source: MDPI journal article supplement (https://www.mdpi.com/2076-3298/8/10/101)
Supplement: s1 [file s1]

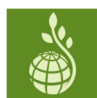

Article

# Polystyrene Nanoplastic Behavior and Toxicity on Crustacean *Daphnia magna* Media Composition, Size, and Surface Charge Effects

Alexis Pochelon, Serge Stoll \* and Vera I. Slaveykova \*

University of Geneva, Faculty of Science, School of Earth and Environmental Sciences Department F.-A. Forel for Environmental and Aquatic Sciences and Institute for Environmental Sciences, Uni Carl Vogt, 66 Boulevard Carl-Vogt, CH-1211 Geneva 4, Switzerland; alexis.pochelon@asleman.org

\* Correspondence: serge.stoll@unige.ch (S.S.); vera.slaveykova@unige.ch (V.I.S.)

## Supplementary Materials

**Table S1.** Characteristics of 20, 40, 60 and 100 nm polystyrene nano-plastics (NPLs) as provided by the manufacturer.

|                                  |                                          |                      |
|----------------------------------|------------------------------------------|----------------------|
| <b>20 nm PS NPLs</b>             |                                          |                      |
| <b>Lot Number : 1855061</b>      | <b>Lot Data</b>                          | <b>Specification</b> |
| Density at 20°C                  | 1.055 g/cm <sup>3</sup>                  | n.a.                 |
| Refractive Index at 590 nm, 20°C | 1.591                                    | n.a.                 |
| Mean Diameter (TEM)              | 0.023 µm                                 | 0.01–0.03 µm         |
| Standard Deviation of Diameter   | 0.005 µm                                 | n.a.                 |
| Percent Solids w/v               | 4.0%                                     | 4.0 + 0.5 %          |
| Specific surface Area            | 2.5 × 10 <sup>6</sup> cm <sup>2</sup> /g | n.a.                 |
| Surface Charge Density           | 3.0 µC/cm <sup>2</sup>                   | n.a.                 |
| Charge Groups per Particle       | 3.0 × 10 <sup>2</sup>                    | n.a.                 |
| <b>40 nm PS NPLs</b>             |                                          |                      |
| <b>Lot Number : 1071753</b>      | <b>Lot Data</b>                          | <b>Specification</b> |
| Density at 20°C                  | 1.055 g/cm <sup>3</sup>                  | n.a.                 |
| Refractive Index at 590 nm, 20°C | 1.591                                    | n.a.                 |
| Mean Diameter (TEM)              | 0.044 µm                                 | n.a.                 |
| Standard Deviation of Diameter   | 0.006 µm                                 | n.a.                 |
| Percent Solids w/v               | 4.0%                                     | 4.0 + 0.5 %          |
| Specific surface Area            | 1.3 × 10 <sup>6</sup> cm <sup>2</sup> /g | n.a.                 |
| Surface Charge Density           | 3.4 µC/cm <sup>2</sup>                   | n.a.                 |
| Charge Groups per Particle       | 1.3 × 10 <sup>3</sup>                    | n.a.                 |
| <b>60 nm PS NPLs</b>             |                                          |                      |
| <b>Lot Number : 1540263</b>      | <b>Lot Data</b>                          | <b>Specification</b> |
| Density at 20°C                  | 1.055 g/cm <sup>3</sup>                  | n.a.                 |
| Refractive Index at 590 nm, 20°C | 1.591                                    | n.a.                 |
| Mean Diameter (TEM)              | 0.068 µm                                 | 0.05–0.07 µm         |
| Standard Deviation of Diameter   | 0.008 µm                                 | n.a.                 |
| Percent Solids w/v               | 4.1%                                     | 4.0 + 0.5 %          |
| Specific surface Area            | 8.4 × 10 <sup>5</sup> cm <sup>2</sup> /g | n.a.                 |
| Surface Charge Density           | 4.8 µC/cm <sup>2</sup>                   | n.a.                 |
| Charge Groups per Particle       | 4.4 × 10 <sup>3</sup>                    | n.a.                 |

| <b>100 nm PS NPLs</b>            |                                          |                      |
|----------------------------------|------------------------------------------|----------------------|
| <b>Lot Number : 1071755</b>      | <b>Lot Data</b>                          | <b>Specification</b> |
| Density at 20°C                  | 1.055 g/cm <sup>3</sup>                  | n.a.                 |
| Refractive Index at 590 nm, 20°C | 1.591                                    | n.a.                 |
| Mean Diameter (TEM)              | 0.10 µm                                  | n.a.                 |
| Standard Deviation of Diameter   | 0.009 µm                                 | n.a.                 |
| Percent Solids w/v               | 4.1%                                     | 4.0 + 0.5 %          |
| Specific surface Area            | 5.7 × 10 <sup>5</sup> cm <sup>2</sup> /g | n.a.                 |
| Surface Charge Density           | 3.2 µC/cm <sup>2</sup>                   | n.a.                 |
| Charge Groups per Particle       | 6.4 × 10 <sup>3</sup>                    | n.a.                 |

**Table S2.** Ionic compositions and DOC of freshwaters sampled from Station 1 to Station 5 of transect Pointe à la Bise. The concentration are mean of 3 replicates, SD is standard deviation.

### Station 1

| Name of element                          | Unit | Mean Value | SD    |
|------------------------------------------|------|------------|-------|
| Sodium Na <sup>+</sup>                   | mg/L | 7.757      | 0.080 |
| Potassium K <sup>+</sup>                 | mg/L | 2.265      | 0.047 |
| Magnesium Mg <sup>2+</sup>               | mg/L | 5.761      | 0.205 |
| Calcium Ca <sup>2+</sup>                 | mg/L | 64.458     | 0.101 |
| Chloride, Cl <sup>-</sup>                | mg/L | 12.242     | 0.057 |
| Phosphate, PO <sub>4</sub> <sup>3-</sup> | mg/L | 0.099      | 0.001 |
| Sulfate SO <sub>4</sub> <sup>2-</sup>    | mg/L | 43.705     | 0.508 |
| Nitrate, NO <sub>3</sub> <sup>-</sup>    | mg/L | 1.710      | 0.012 |
| Dissolved Organic Carbon (DOC)           | mg/L | 1.681      | 0.004 |

### Station 2

| Name of element                          | Unit | Mean Value | SD     |
|------------------------------------------|------|------------|--------|
| Sodium Na <sup>+</sup>                   | mg/L | 7.771      | 0.012  |
| Potassium K <sup>+</sup>                 | mg/L | 1.947      | 0.011  |
| Magnesium Mg <sup>2+</sup>               | mg/L | 5.817      | 0.040  |
| Calcium Ca <sup>2+</sup>                 | mg/L | 62.289     | 0.1076 |
| Chloride, Cl <sup>-</sup>                | mg/L | 11.181     | 0.077  |
| Phosphate, PO <sub>4</sub> <sup>3-</sup> | mg/L | 0.112      | 0.001  |
| Sulfate SO <sub>4</sub> <sup>2-</sup>    | mg/L | 44.667     | 0.317  |
| Nitrate, NO <sub>3</sub> <sup>-</sup>    | mg/L | 1.506      | 0.017  |
| Dissolved Organic Carbon (DOC)           | mg/L | 1.515      | 0.004  |

### Station 3

| Name of element                          | Unit | Mean Value | SD    |
|------------------------------------------|------|------------|-------|
| Sodium Na <sup>+</sup>                   | mg/L | 7.489      | 0.049 |
| Potassium K <sup>+</sup>                 | mg/L | 1.936      | 0.001 |
| Magnesium Mg <sup>2+</sup>               | mg/L | 5.437      | 0.088 |
| Calcium Ca <sup>2+</sup>                 | mg/L | 58.175     | 0.049 |
| Chloride, Cl <sup>-</sup>                | mg/L | 10.786     | 0.009 |
| Phosphate, PO <sub>4</sub> <sup>3-</sup> | mg/L | 0.088      | 0.004 |
| Sulfate SO <sub>4</sub> <sup>2-</sup>    | mg/L | 44.740     | 0.039 |
| Nitrate, NO <sub>3</sub> <sup>-</sup>    | mg/L | 1.560      | 0.001 |
| Dissolved Organic Carbon (DOC)           | mg/L | 1.326      | 0.004 |

### Station 4

| Name of element                          | Unit | Mean Value | SD    |
|------------------------------------------|------|------------|-------|
| Sodium Na <sup>+</sup>                   | mg/L | 7.448      | 0.001 |
| Potassium K <sup>+</sup>                 | mg/L | 1.887      | 0.008 |
| Magnesium Mg <sup>2+</sup>               | mg/L | 5.195      | 0.005 |
| Calcium Ca <sup>2+</sup>                 | mg/L | 54.753     | 0.014 |
| Chloride, Cl <sup>-</sup>                | mg/L | 10.763     | 0.019 |
| Phosphate, PO <sub>4</sub> <sup>3-</sup> | mg/L | 0.042      | 0.001 |
| Sulfate SO <sub>4</sub> <sup>2-</sup>    | mg/L | 45.271     | 0.251 |
| Nitrate, NO <sub>3</sub> <sup>-</sup>    | mg/L | 1.679      | 0.008 |
| Dissolved Organic Carbon (DOC)           | mg/L | 1.116      | 0.004 |

**Station 5**

| Name of element                          | Unit | Mean Value | SD    |
|------------------------------------------|------|------------|-------|
| Sodium Na <sup>+</sup>                   | mg/L | 7.785      | 0.006 |
| Potassium K <sup>+</sup>                 | mg/L | 1.685      | 0.027 |
| Magnesium Mg <sup>2+</sup>               | mg/L | 5.165      | 0.003 |
| Calcium Ca <sup>2+</sup>                 | mg/L | 50.275     | 0.144 |
| Chloride, Cl <sup>-</sup>                | mg/L | 10.749     | 0.004 |
| Phosphate, PO <sub>4</sub> <sup>3-</sup> | mg/L | 0.000      | n.a.  |
| Sulfate SO <sub>4</sub> <sup>2-</sup>    | mg/L | 46.194     | 0.171 |
| Nitrate, NO <sub>3</sub> <sup>-</sup>    | mg/L | 2.026      | 0.014 |
| Dissolved Organic Carbon (DOC)           | mg/L | 0.8795     | 0.004 |

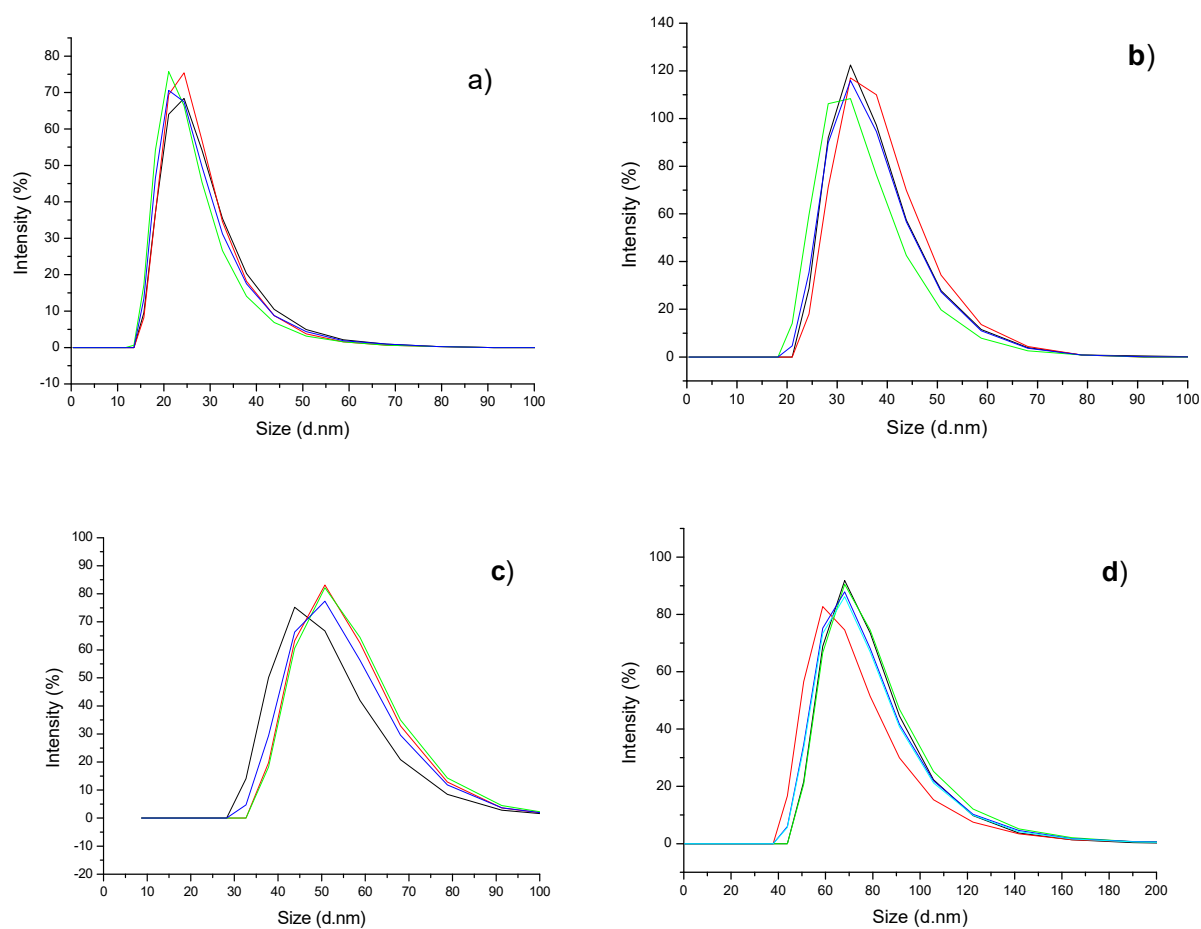

**Figure S1.** Intensity Particle Size Distribution measured in Ultra-Pure Water by Dynamic Light Scattering: (a) 20, (b) 40, (c) 60 and (d) 100 nm NPLs. The different colors indicate consecutively measurements (10 sub-measures for each).

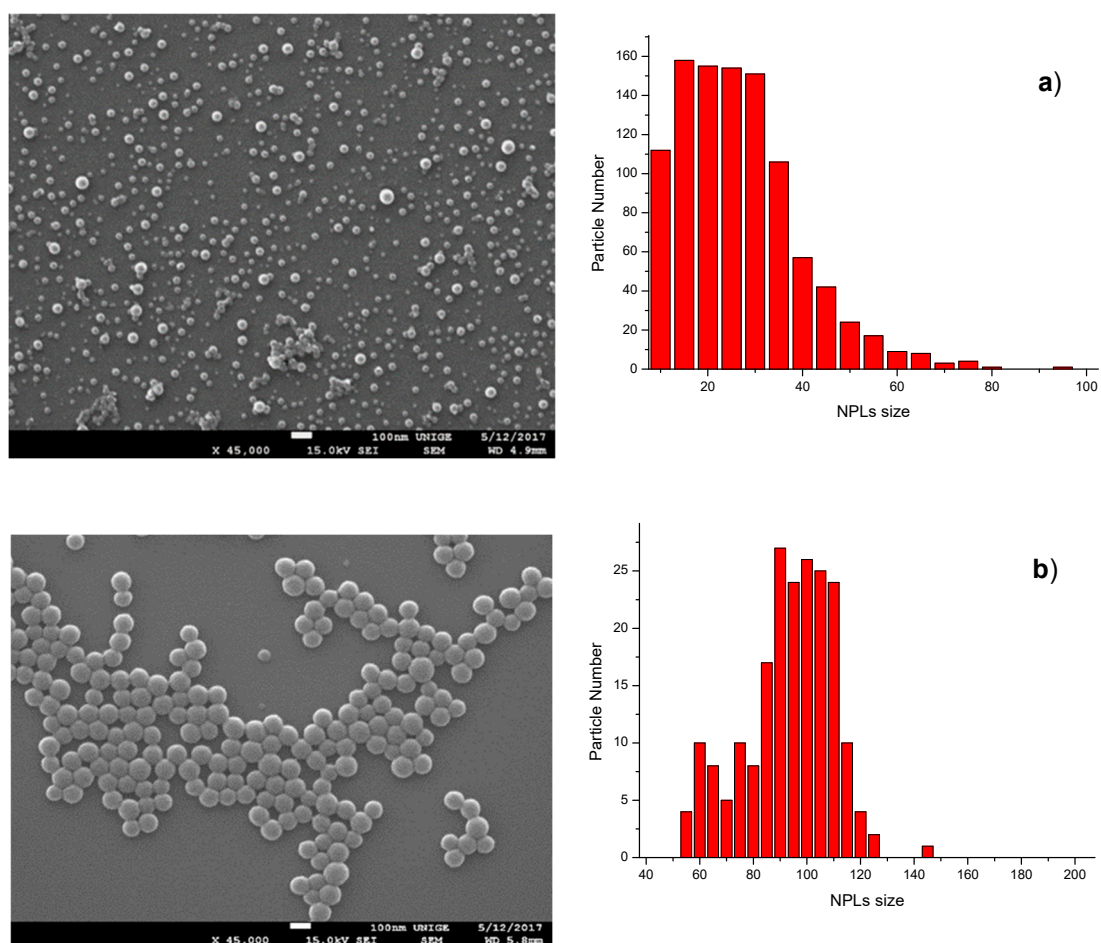

**Figure S2.** SEM images and results of size image analysis of (a) 20 and (b) 100 nm NPLs.



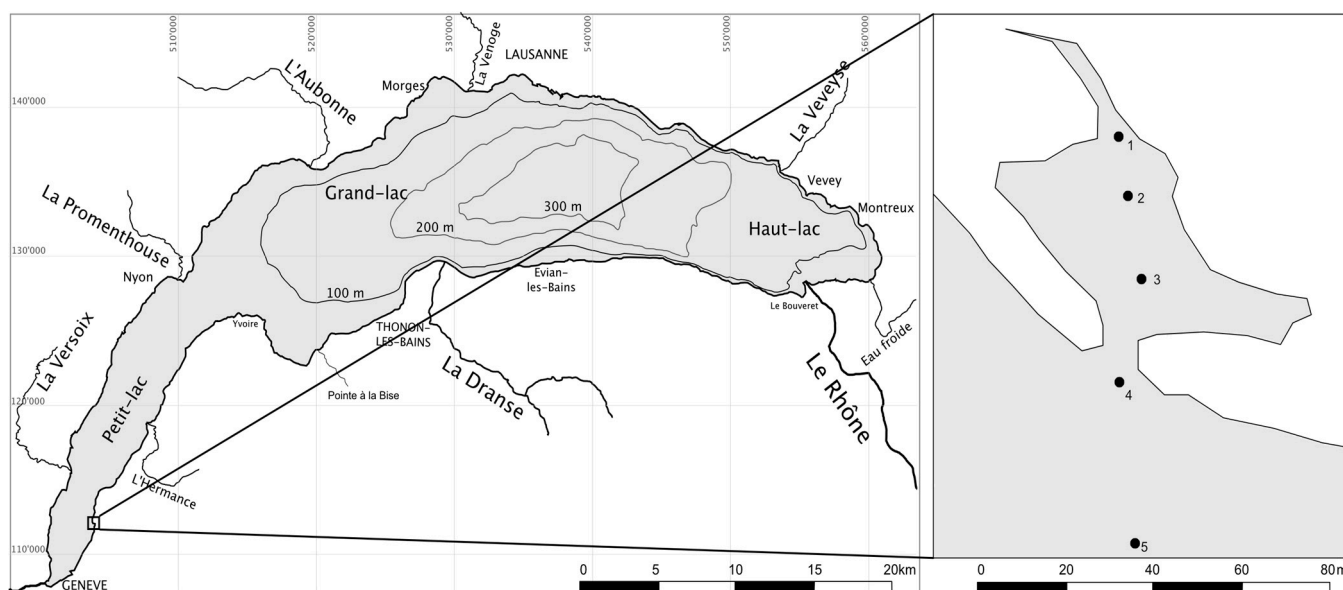

**Figure S3.** Lake Geneva map and location of the ‘Pointe-à-la-Bise’ marsh (left). Insert corresponds to the ‘Pointe-à-la-bise’ area and the transect is indicated by the different numbers (right).

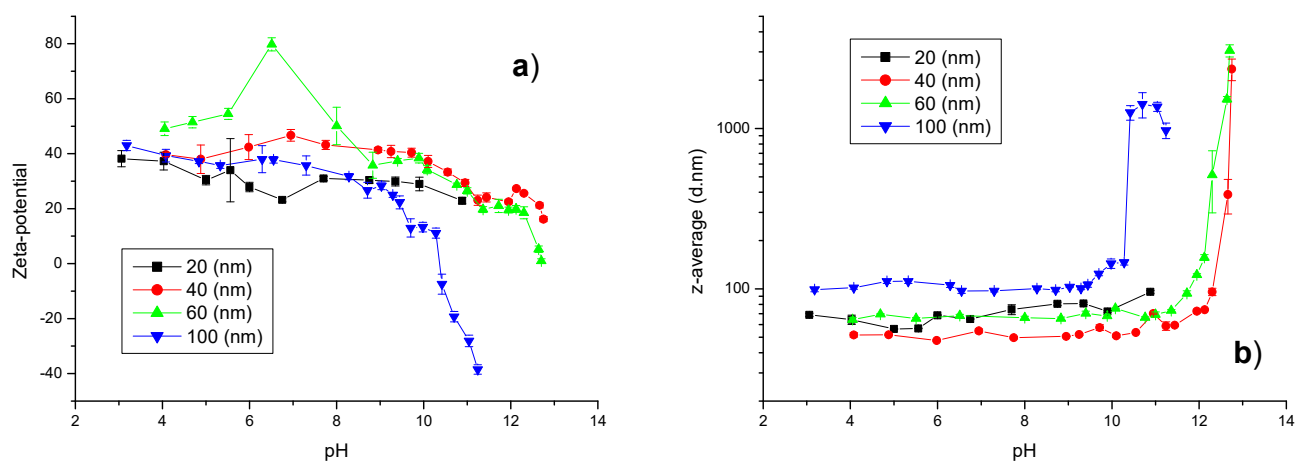

**Figure S4.**  $\zeta$ -Potential and z-average hydrodynamic diameter (nm) variations as a function of pH obtained in ultra-pure water. .
